# Supplementary material for: Characterization of Antioxidant Potential of Seaweed Extracts for Enrichment of Convenience Food
Source: MDPI journal article supplement (doi:10.3390/antiox9030249), 2020-03-19
Supplement: s1 [file s1]

**Supplementary Materials:**

**Supplemental Table 1. Overview of time and temperature during the production of the rye snack: mixing, extrusion, drying, cooling, packaging.**

| Process<br>part-<br>name<br>Time<br>Temperature | Dough<br>mixing<br><br>10 min<br>25 C | Extrusion |        |        | Transport<br>band | Drying<br>oven | Cooling<br>spiral | Transport<br>band | Package<br>machine |
|-------------------------------------------------|---------------------------------------|-----------|--------|--------|-------------------|----------------|-------------------|-------------------|--------------------|
|                                                 |                                       | 1. part   | 2.part | 3.part |                   |                |                   |                   |                    |
|                                                 |                                       | 20 sec    | 5 sec  | 5 sec  | 1 min             | 13 min         | 20 min            | 5 min             | 5 min              |
|                                                 |                                       | 45°C      | 55°C   | 140°C  | 60°C              | 90-100°C       | 40°C              | 30°C              | 30°C               |
|                                                 |                                       | 30 sek    |        |        | 44 minutes        |                |                   |                   |                    |

**Supplemental Table 2. List of raw materials, mix of flour, and extruded rye snacks utilized to study the antioxidative action of different flavourings and different amounts of seaweed extracts.**

| Group            | Components             | Seaweed, amount (%) |
|------------------|------------------------|---------------------|
| Raw materials    | Rye mix                | 0                   |
| Raw materials    | Seaweed                | 0                   |
| Raw materials    | Garlic powder (1%)     | 0                   |
| Raw materials    | Basil powder (0.5%)    | 0                   |
| Raw materials    | Tomato powder (3 %)    | 0                   |
| Raw materials    | Rosemary powder (0.5%) | 0                   |
| Mix of flour     | 1% garlic              | 0                   |
| Mix of flour     | 1% garlic              | 2                   |
| Mix of flour     | 1% garlic              | 3                   |
| Mix of flour     | 1% garlic              | 4                   |
| Mix of flour     | 1% garlic              | 5                   |
| Mix of flour     | 0.5% basil + 3% tomato | 0                   |
| Mix of flour     | 0.5% basil + 3% tomato | 2                   |
| Mix of flour     | 0.5% basil + 3% tomato | 3                   |
| Mix of flour     | 0.5% basil + 3% tomato | 4                   |
| Mix of flour     | 0.5% basil + 3% tomato | 5                   |
| Mix of flour     | 0.5% rosemary          | 0                   |
| Mix of flour     | 0.5% rosemary          | 2                   |
| Mix of flour     | 0.5% rosemary          | 3                   |
| Mix of flour     | 0.5% rosemary          | 4                   |
| Mix of flour     | 0.5% rosemary          | 5                   |
| Extruded samples | 1% garlic              | 0                   |
| Extruded samples | 1% garlic              | 2                   |
| Extruded samples | 1% garlic              | 3                   |
| Extruded samples | 1% garlic              | 4                   |
| Extruded samples | 1% garlic              | 5                   |
| Extruded samples | 0.5% basil + 3% tomato | 0                   |
| Extruded samples | 0.5% basil + 3% tomato | 2                   |
| Extruded samples | 0.5% basil + 3% tomato | 3                   |
| Extruded samples | 0.5% basil + 3% tomato | 4                   |
| Extruded samples | 0.5% basil + 3% tomato | 5                   |
| Extruded samples | 0.5% rosemary          | 0                   |
| Extruded samples | 0.5% rosemary          | 2                   |
| Extruded samples | 0.5% rosemary          | 3                   |
| Extruded samples | 0.5% rosemary          | 4                   |
| Extruded samples | 0.5% rosemary          | 5                   |

**Supplemental Table 3. List of snack prototypes produced to study the effect of different flavourings and roasting on antioxidant properties of rye snacks enriched with *Fucus vesiculosus* extracts.**

| Description                                                              |           |
|--------------------------------------------------------------------------|-----------|
| Rye-Mix+ 0.8% Himalayan salt                                             | Unroasted |
| Rye-Mix+ 0.8% Himalayan salt                                             | Roasted   |
| Rye-Mix+2.1% seaweed + 0.8% Himalayan salt                               | Unroasted |
| Rye-Mix+2.1% seaweed + 0.8% Himalayan salt                               | Roasted   |
| Rye-Mix+2.1% seaweed + 1% garlic+ 0.8% Himalayan salt                    | Unroasted |
| Rye-Mix+2.1% seaweed + 1% garlic+ 0.8% Himalayan salt                    | Roasted   |
| Rye-Mix+2.1% seaweed + 0.5% basil+ 3% tomato powder+ 0.8% Himalayan salt | Unroasted |
| Rye-Mix+2.1% seaweed + 0.5% basil+ 3% tomato powder+ 0.8% Himalayan salt | Roasted   |
| Rye-Mix+2.1% seaweed + 0.5% rosemary+ 0.8% Himalayan salt                | Unroasted |
| Rye-Mix+2.1% seaweed + 0.5% rosemary+ 0.8% Himalayan salt                | Roasted   |
